# Supplementary material for: The transcript catalogue of the short-lived fish Nothobranchius furzeri provides insights into age-dependent changes of mRNA levels
Source: PubMed Central journal article supplement (PMC3605293; doi:10.1186/1471-2164-14-185), 2013-03-16
Supplement: 1471-2164-14-185-S2.pdf [file 1471-2164-14-185-S2.pdf]

A

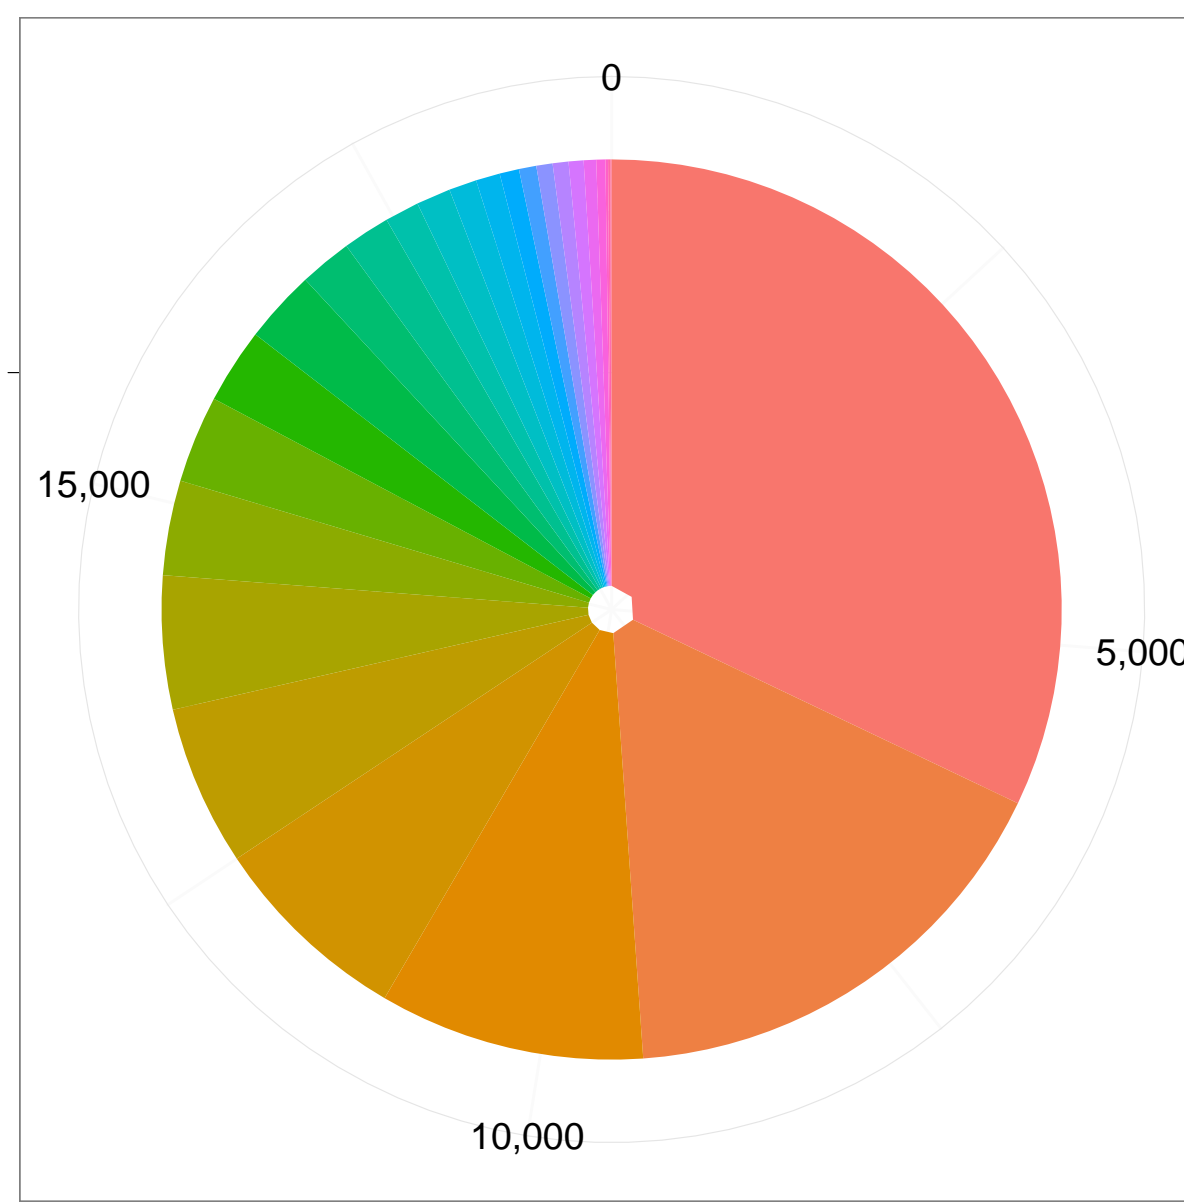

Occurrences of GO-Slim terms

**biological process**

- metabolic process
- regulation of biological process
- transport
- transcription
- multicellular organismal development
- cellular component organization
- cell communication
- anatomical structure morphogenesis
- cell differentiation
- response to stress
- embryonic development
- translation
- cell cycle
- death
- cell proliferation
- growth
- reproduction
- response to external stimulus
- cellular homeostasis
- response to endogenous stimulus
- behavior
- response to abiotic stimulus
- response to biotic stimulus
- viral reproduction
- cell recognition
- symbiosis

B

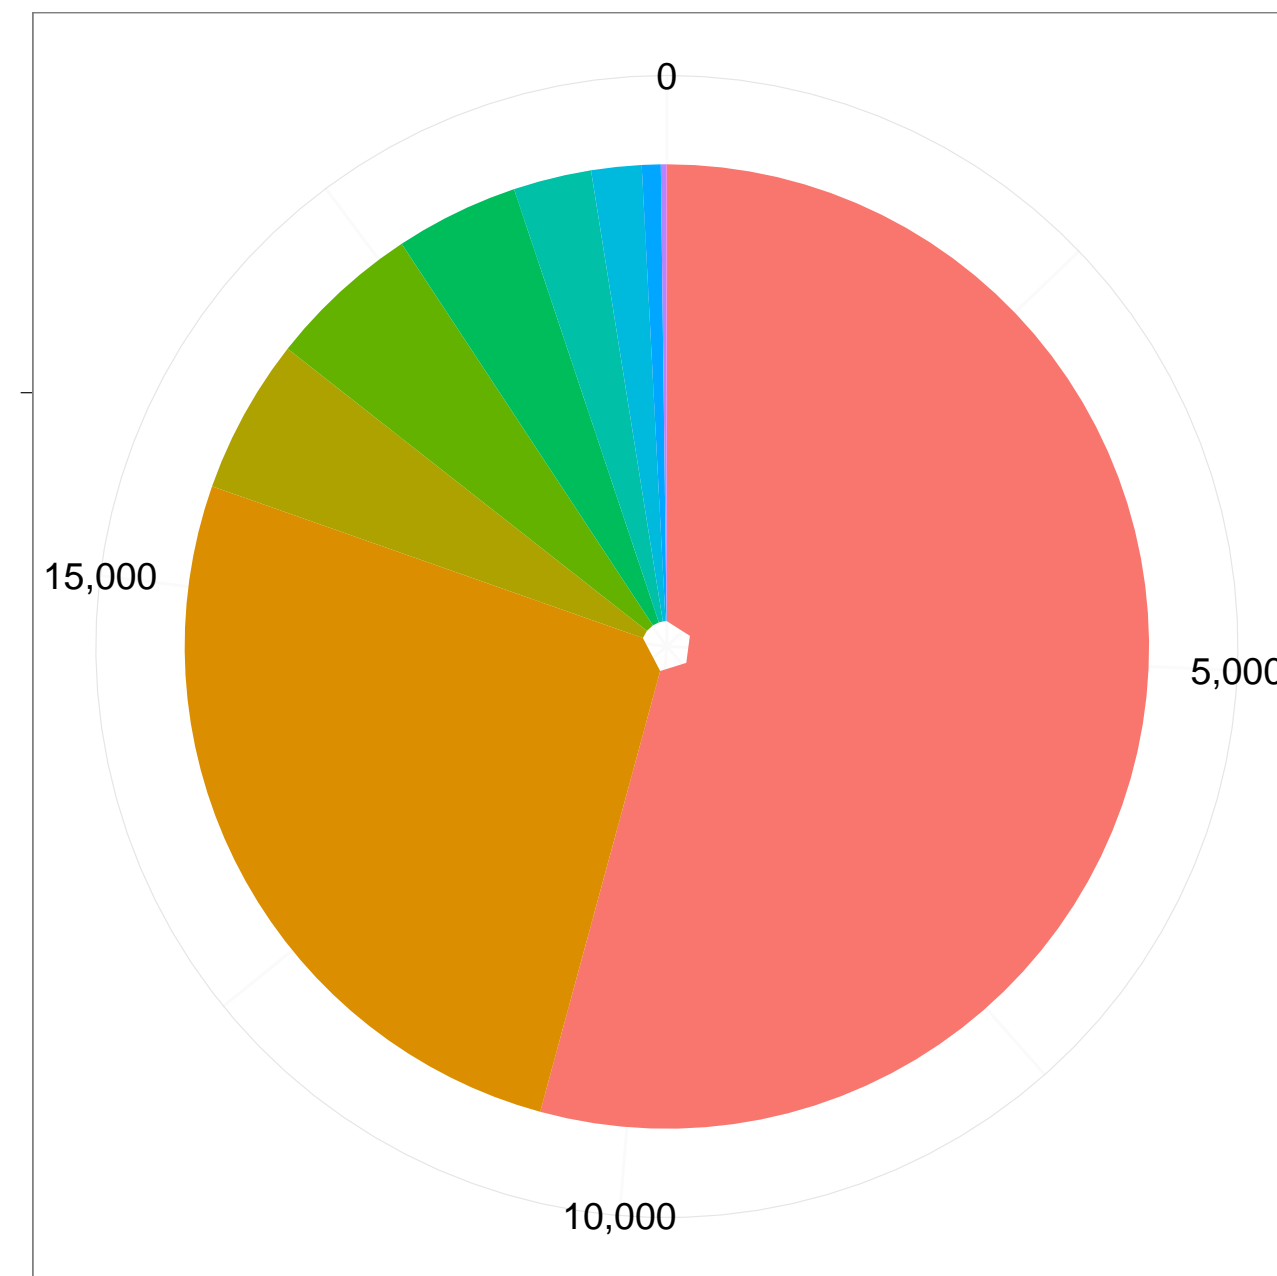

Occurrences of GO-Slim terms

**molecular function**

- binding
- catalytic activity
- transporter activity
- transcription regulator activity
- signal transducer activity
- enzyme regulator activity
- structural molecule activity
- electron carrier activity
- antioxidant activity
- translation regulator activity
- protein tag

C

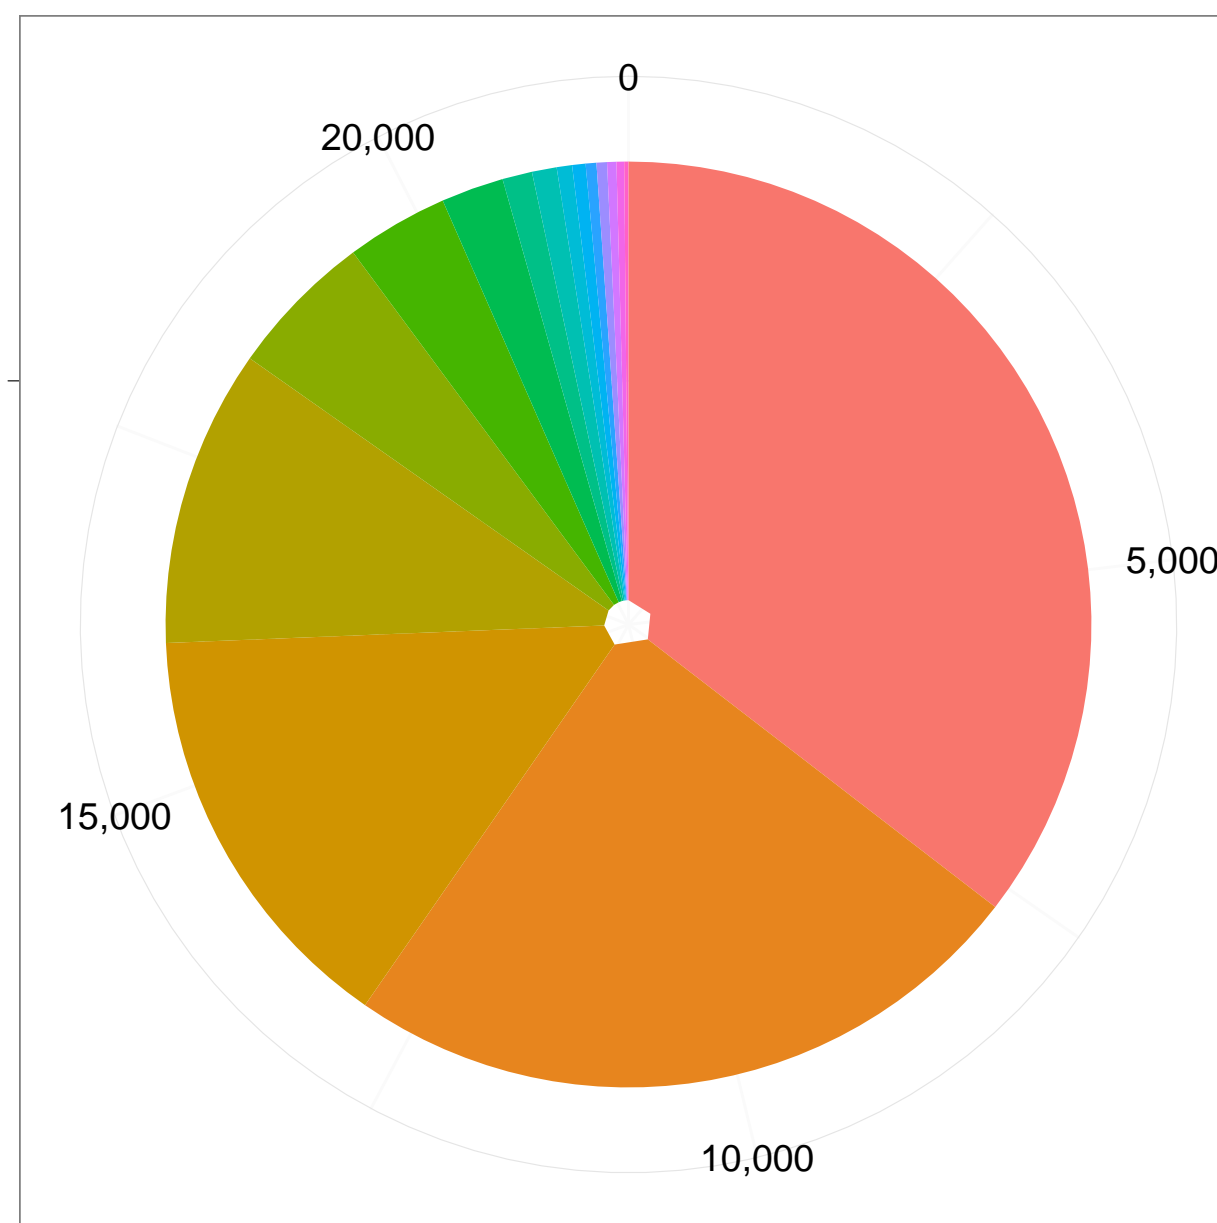

Occurrences of GO-Slim terms

**cellular component**

- cell
- intracellular
- organelle
- cytoplasm
- protein complex
- plasma membrane
- extracellular region
- nucleoplasm
- cytosol
- extracellular space
- microtubule organizing center
- external encapsulating structure
- proteinaceous extracellular matrix
- cell envelope
- nuclear envelope
- cilium
- lipid particle
